# Supplementary material
Source: PubMed Central journal article supplement (PMC3644625)
Supplement: mmc1.pdf [file mmc1.pdf]

## **Supplemental Data**

### **A De Novo Mutation in the $\beta$ -Tubulin Gene *TUBB4A***

### **Results in the Leukoencephalopathy Hypomyelination**

### **with Atrophy of the Basal Ganglia and Cerebellum**

Cas Simons, Nicole I. Wolf, Nathan McNeil, Ljubica Caldovic, Joseph M. Devaney, Asako Takanohashi, Joanna Crawford, Kelin Ru, Sean M. Grimmond, David Miller, Davide Tonduti, Johanna L. Schmidt, Robert S. Chudnow, Rudy van Coster, Lieven Lagae, Jill Kisler, Jürgen Sperner, Marjo S. van der Knaap, Raphael Schiffmann, Ryan J. Taft, and Adeline Vanderver

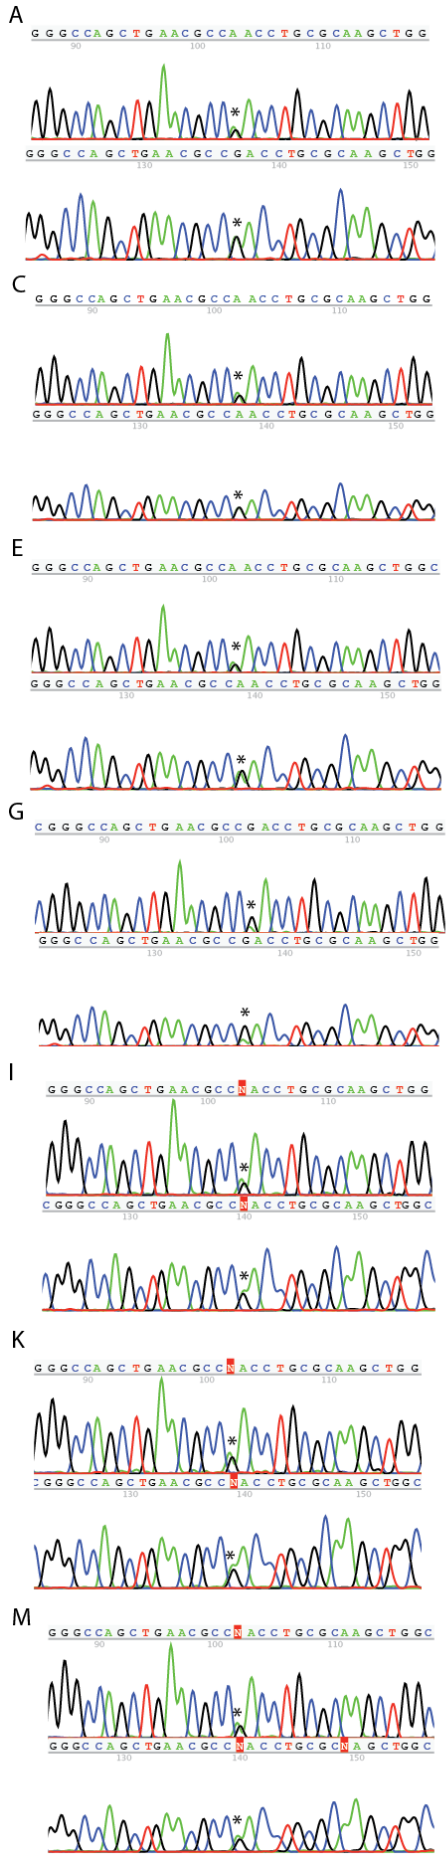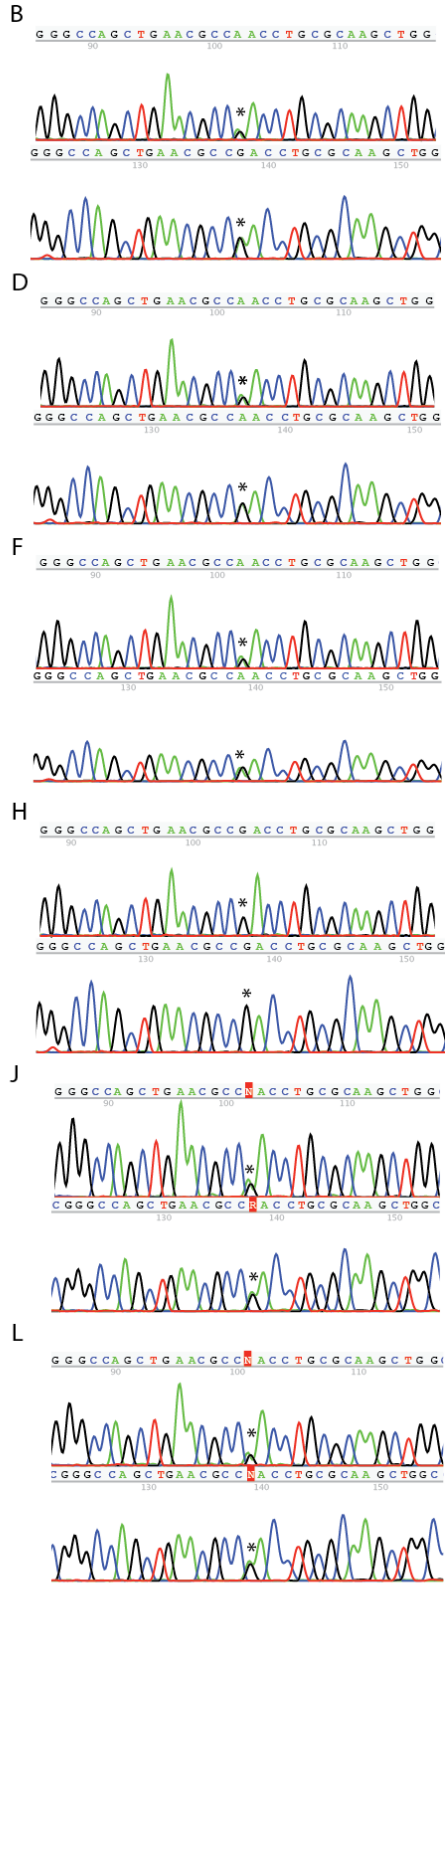

## Figure S1. Validation of the *TUBB4A* c.G745A Variant

Sanger sequence of blood DNA from eleven affected individuals from ten unrelated families and the parents of the LD\_0638 family. Position c.G745 is indicated with a "\*" in each panel, forward (top) and reverse (bottom) reads are given for each individual. Samples: LD\_0313.0A (A), LD\_0345.0A (B), LD\_0440.0A (C), LD\_0605.0A (D), LD\_0638.0A (E), LD\_0638.0B (F), LD\_0638.1 (G; mosaic) LD\_0638.2 (H; wild-type), HA04 (I), HA07 (J), HA23 (K), HA27 (L) and HA107 (M).

**Table S1. Summary of Exome Sequencing Statistics**

| Family  | Individual | Affected | Mapped Sequence (Gb) | Target Bases <sup>a</sup> |           |                            |
|---------|------------|----------|----------------------|---------------------------|-----------|----------------------------|
|         |            |          |                      | Mean Depth                | Q20 Depth | Percent > 18x <sup>b</sup> |
| LD_0313 | LD_0313.0A | Yes      | 14.7                 | 87.8                      | 84.7      | 97.2                       |
|         | LD_0313.1  | No       | 21.3                 | 40.6                      | 39.9      | 96.8                       |
|         | LD_0313.2  | No       | 13.8                 | 33.6                      | 32.8      | 95.6                       |
| LD_0345 | LD_0345.0A | Yes      | 9.9                  | 40.5                      | 39.1      | 93.5                       |
|         | LD_0345.1  | No       | 27.9                 | 21.1                      | 20.6      | 93.1                       |
|         | LD_0345.2  | No       | 21.0                 | 36.5                      | 35.5      | 95.9                       |
| LD_0440 | LD_0440.0A | Yes      | 7.7                  | 56.0                      | 53.7      | 94.4                       |
|         | LD_0440.01 | No       | 10.2                 | 49.1                      | 47.0      | 90.8                       |
|         | LD_0440.1  | No       | 19.6                 | 26.5                      | 26.0      | 94.6                       |
|         | LD_0440.2  | No       | 17.6                 | 102.1                     | 98.0      | 97.2                       |
| LD_0605 | LD_0605.0A | Yes      | 30.2                 | 156.6                     | 149.5     | 98.0                       |
|         | LD_0605.1  | No       | 15.9                 | 58.4                      | 56.6      | 96.0                       |
|         | LD_0605.2  | No       | 12.9                 | 58.9                      | 56.5      | 95.5                       |
| LD_0638 | LD_0638.0A | Yes      | 10.3                 | 75.2                      | 72.1      | 95.7                       |
|         | LD_0638.0B | Yes      | 10.7                 | 79.4                      | 76.1      | 95.9                       |
|         | LD_0638.1  | No       | 10.4                 | 80.0                      | 77.2      | 95.6                       |
|         | LD_0638.2  | No       | 13.8                 | 103.2                     | 99.2      | 97.1                       |
| HA27    | HA27       | Yes      | 20.1                 | 237.5                     | 229.4     | 92.0                       |
|         | HA28       | No       | 7.1                  | 73.3                      | 70.1      | 84.0                       |
|         | HA29       | No       | 7.8                  | 80.1                      | 77.4      | 84.5                       |
| HA107   | HA107      | Yes      | 10.8                 | 91.7                      | 86.1      | 96.0                       |
|         | HA108      | No       | 14.0                 | 113.5                     | 106.4     | 96.9                       |
|         | HA109      | No       | 12.5                 | 103.1                     | 99.6      | 96.5                       |
| HA04    | HA04       | Yes      | 17.3                 | 205.7                     | 199.5     | 91.9                       |
| HA07    | HA07       | Yes      | 18.4                 | 218.9                     | 212.2     | 91.5                       |
| HA23    | HA23       | Yes      | 20.6                 | 240.4                     | 232.0     | 91.5                       |

<sup>a</sup>Bases captured by SeqCap EZ Human Exome Library v3.0 kit.

<sup>b</sup>The percentage of target bases covered by a minimum of 18 reads.
